# Supplementary material for: Effect of Donor Age on Endocrine Function of and Immune Response to Ovarian Grafts
Source: MDPI journal article supplement (doi:10.3390/ijms25063431), 2024-03-19
Supplement: s1 [file s1]

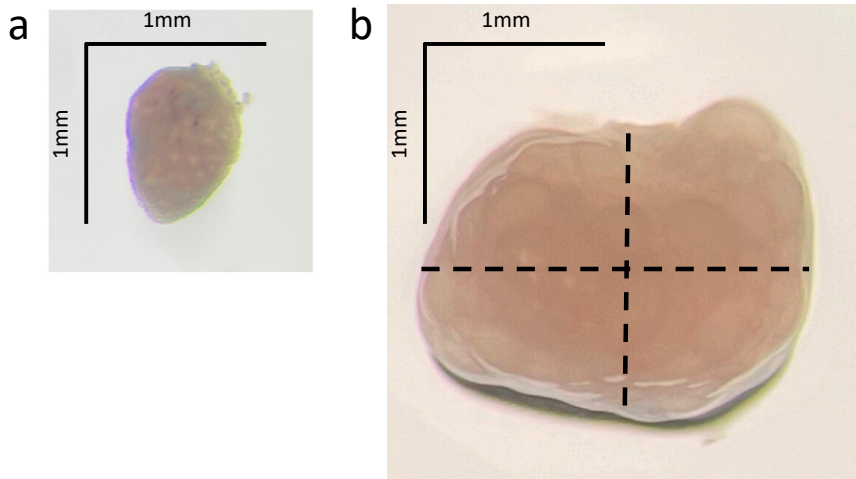

**Figure S1.** Ovarian tissue was isolated from 6-8 (D7) **(a)** or 20-22 (D21) **(b)** days old mice. To standardize the volume of tissue transplanted across all groups D21 ovaries were cut into quarters (dotted lines).

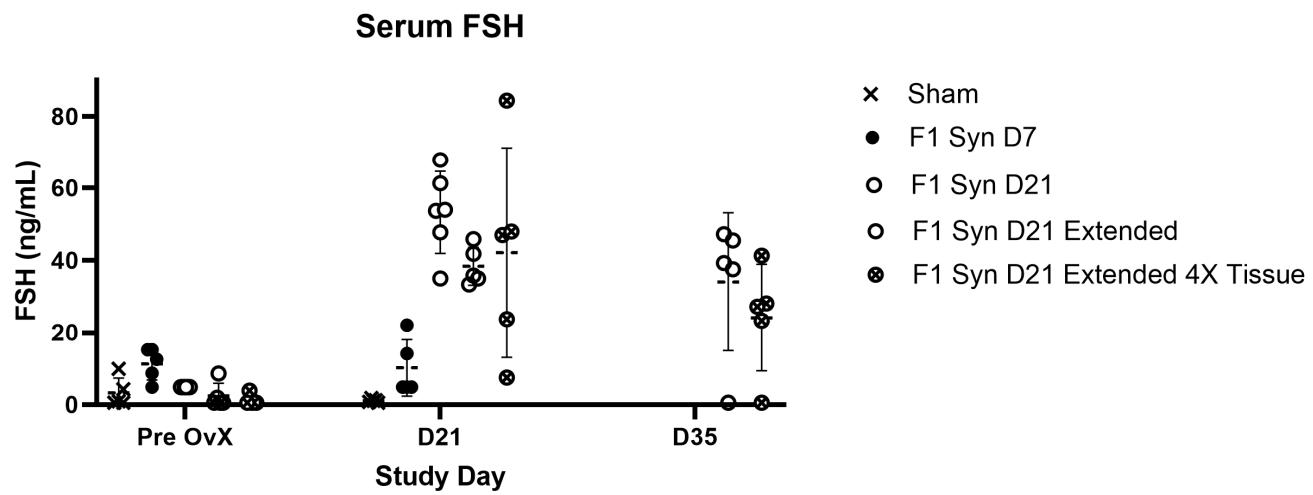

**Figure S2.** Only tissue from syngeneic prepubertal D7 donors was capable of restoring negative feedback to the HPG axis and suppressing FSH secretion
